# Supplementary material for: The Efficacy and Safety of Pharmacological Treatments for Restless Legs Syndrome: Systemic Review and Network Meta-Analysis
Source: PubMed Central journal article supplement (PMC8576256; doi:10.3389/fnins.2021.751643), 2021-10-26
Supplement: Data_Sheet_1.pdf [file Data_Sheet_1.pdf]

## Supplementary Material

### 1 Supplementary Figures and Tables

#### 1.1 Supplementary Figures

|                         | Random sequence generation (selection bias) | Allocation concealment (selection bias) | Blinding of participants and personnel (performance bias) | Blinding of outcome assessment (detection bias) | Incomplete outcome data (attrition bias) | Selective reporting (reporting bias) | Other bias |
|-------------------------|---------------------------------------------|-----------------------------------------|-----------------------------------------------------------|-------------------------------------------------|------------------------------------------|--------------------------------------|------------|
| Aaron L 2011            | ?                                           | ?                                       | ?                                                         | ?                                               | ?                                        | ?                                    | ?          |
| Arthur, S. W. 2004      | ?                                           | ?                                       | ?                                                         | ?                                               | ?                                        | ?                                    | ?          |
| Arthur, S. W. 2009      | ?                                           | ?                                       | ?                                                         | ?                                               | ?                                        | ?                                    | ?          |
| Birgit, H. 2011         | ?                                           | ?                                       | ?                                                         | ?                                               | ?                                        | ?                                    | ?          |
| Cho, Y. W. 2017         | ?                                           | ?                                       | ?                                                         | ?                                               | ?                                        | ?                                    | ?          |
| Christopher, J. E. 2007 | ?                                           | ?                                       | ?                                                         | ?                                               | ?                                        | ?                                    | ?          |
| Claudia, T. 2004        | ?                                           | ?                                       | ?                                                         | ?                                               | ?                                        | ?                                    | ?          |
| Claudia, T. 2006        | ?                                           | ?                                       | ?                                                         | ?                                               | ?                                        | ?                                    | ?          |
| Claudia, T. 2007        | ?                                           | ?                                       | ?                                                         | ?                                               | ?                                        | ?                                    | ?          |
| Claudia, T. 2008        | ?                                           | ?                                       | ?                                                         | ?                                               | ?                                        | ?                                    | ?          |
| Claudia, T. 2013        | ?                                           | ?                                       | ?                                                         | ?                                               | ?                                        | ?                                    | ?          |
| Claudia, T. 2017        | ?                                           | ?                                       | ?                                                         | ?                                               | ?                                        | ?                                    | ?          |
| Claudio, L. 2011        | ?                                           | ?                                       | ?                                                         | ?                                               | ?                                        | ?                                    | ?          |
| Daniel O. L. 2011       | ?                                           | ?                                       | ?                                                         | ?                                               | ?                                        | ?                                    | ?          |
| Deng, Y. H. 2017        | ?                                           | ?                                       | ?                                                         | ?                                               | ?                                        | ?                                    | ?          |
| Diego, G. B. 2010       | ?                                           | ?                                       | ?                                                         | ?                                               | ?                                        | ?                                    | ?          |
| Diego, G. B. 2012       | ?                                           | ?                                       | ?                                                         | ?                                               | ?                                        | ?                                    | ?          |
| Diego, G. B. 2015       | ?                                           | ?                                       | ?                                                         | ?                                               | ?                                        | ?                                    | ?          |
| Jacques, M. 2006        | ?                                           | ?                                       | ?                                                         | ?                                               | ?                                        | ?                                    | ?          |
| James, W. 2009          | ?                                           | ?                                       | ?                                                         | ?                                               | ?                                        | ?                                    | ?          |
| John, W. W. 2011        | ?                                           | ?                                       | ?                                                         | ?                                               | ?                                        | ?                                    | ?          |
| Karin, S. K. 2004       | ?                                           | ?                                       | ?                                                         | ?                                               | ?                                        | ?                                    | ?          |
| Karin, S. K. 2004       | ?                                           | ?                                       | ?                                                         | ?                                               | ?                                        | ?                                    | ?          |
| Kolster, K. S. 2004     | ?                                           | ?                                       | ?                                                         | ?                                               | ?                                        | ?                                    | ?          |
| Lee, C. S. 2014         | ?                                           | ?                                       | ?                                                         | ?                                               | ?                                        | ?                                    | ?          |
| Ludger, G. 2009         | ?                                           | ?                                       | ?                                                         | ?                                               | ?                                        | ?                                    | ?          |
| Luigi, F. S. 2008       | ?                                           | ?                                       | ?                                                         | ?                                               | ?                                        | ?                                    | ?          |
| Ma, J. F. 2012          | ?                                           | ?                                       | ?                                                         | ?                                               | ?                                        | ?                                    | ?          |
| Markku, P. 2006         | ?                                           | ?                                       | ?                                                         | ?                                               | ?                                        | ?                                    | ?          |
| Nazarin, R. 2015        | ?                                           | ?                                       | ?                                                         | ?                                               | ?                                        | ?                                    | ?          |
| Neal, H. 2016           | ?                                           | ?                                       | ?                                                         | ?                                               | ?                                        | ?                                    | ?          |
| Oertel, W. H. 2006      | ?                                           | ?                                       | ?                                                         | ?                                               | ?                                        | ?                                    | ?          |
| Pasquale, M. 2011       | ?                                           | ?                                       | ?                                                         | ?                                               | ?                                        | ?                                    | ?          |
| Richard, A. 2010        | ?                                           | ?                                       | ?                                                         | ?                                               | ?                                        | ?                                    | ?          |
| Richard, K. B. 2006     | ?                                           | ?                                       | ?                                                         | ?                                               | ?                                        | ?                                    | ?          |
| Richard, K. B. 2010     | ?                                           | ?                                       | ?                                                         | ?                                               | ?                                        | ?                                    | ?          |
| Richard, P. A. 2011     | ?                                           | ?                                       | ?                                                         | ?                                               | ?                                        | ?                                    | ?          |
| Richard, P. A. 2014     | ?                                           | ?                                       | ?                                                         | ?                                               | ?                                        | ?                                    | ?          |
| Susan, A. 2012          | ?                                           | ?                                       | ?                                                         | ?                                               | ?                                        | ?                                    | ?          |
| Wayne, A. H. 2010       | ?                                           | ?                                       | ?                                                         | ?                                               | ?                                        | ?                                    | ?          |
| Winkelmann, J. W. 2006  | ?                                           | ?                                       | ?                                                         | ?                                               | ?                                        | ?                                    | ?          |
| Wolfgang, H. O. 2010    | ?                                           | ?                                       | ?                                                         | ?                                               | ?                                        | ?                                    | ?          |
| Wolfgang H. O. 2010     | ?                                           | ?                                       | ?                                                         | ?                                               | ?                                        | ?                                    | ?          |
| Wolfgang H. 2007        | ?                                           | ?                                       | ?                                                         | ?                                               | ?                                        | ?                                    | ?          |
| Yuichi, I. 2010         | ?                                           | ?                                       | ?                                                         | ?                                               | ?                                        | ?                                    | ?          |
| Yuichi, I. 2013         | ?                                           | ?                                       | ?                                                         | ?                                               | ?                                        | ?                                    | ?          |
| Zhang, J. Y. 2015       | ?                                           | ?                                       | ?                                                         | ?                                               | ?                                        | ?                                    | ?          |

**Supplementary Figure 1.** Risk bias of randomized controlled studies

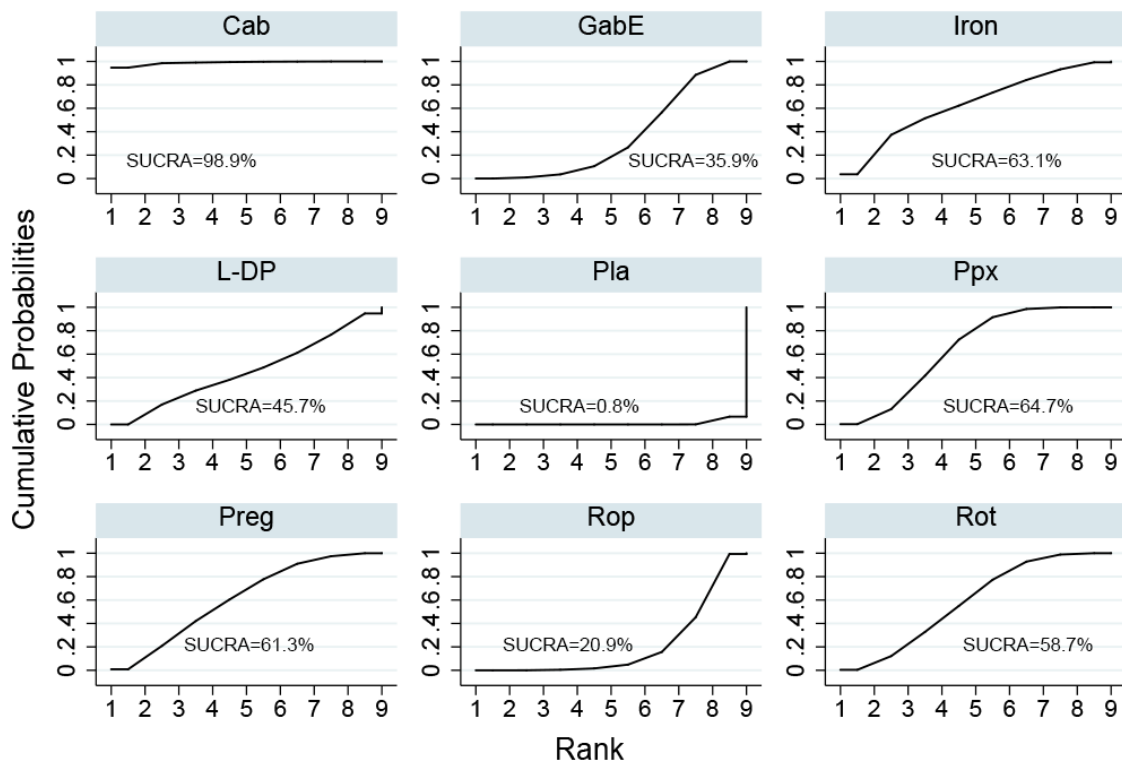

**Supplementary Figure 2.** Surface Under the Cumulative Ranking Curve of treatments for primary RLS patients.

## 1.2 Supplementary Tables

**Supplementary Table 1.** The characteristic of included studies

| Source                  | Country                  | Diagnosis     | Type of interventions | Sample size | Gender (Female%) | Age(year)   | Duration(year) | change of IRLS scores from baseline(mean±SD) |
|-------------------------|--------------------------|---------------|-----------------------|-------------|------------------|-------------|----------------|----------------------------------------------|
| Karin, S.K. 2004        | Germany                  | primary RLS   | Rotigotine            | 49          | 73.7             | 58.3± 8.7   | 10.3±10.9      | -15.7±8.28                                   |
|                         |                          |               | Placebo               | 14          | 50               | 60.1±8.5    | 8.4 ± 7.0      | -7.4±8.23                                    |
| Wolfgang, H. 2007       | Austria, Germany, et al. | primary RLS   | Pramipexole           | 224         | 64.3             | 55.4±11.6   | 4.95±9.2       | -12.3±8.98                                   |
|                         |                          |               | Placebo               | 114         | 68.4             | 55.8±10.9   | 5.63±9.1       | -5.7±9.61                                    |
| Christopher, J. E. 2007 | USA                      | primary RLS   | Iron                  | 11          | 55               | 66.4±11.4   | NA             | -10.1±5.10                                   |
|                         |                          |               | Placebo               | 7           | 71               | 61.4±10.0   | NA             | -12.0±11.50                                  |
| Claudia, T. 2007        | NA                       | primary RLS   | Cabergoline           | 178         | 67.4             | 56.9±11.7   | 11.0±12.0      | -16.1±10.20                                  |
|                         |                          |               | Levodopa              | 183         | 74.9             | 58.7±11.6   | 12.1± 13.6     | -9.6±9.70                                    |
| Richard, K. B. 2010     | USA                      | primary RLS   | Gabapentin Enacarbil  | 96          | 65               | 50.7±11.68  | 12.3±12.7      | -3.2±6.11                                    |
|                         |                          |               | Placebo               | 97          | 54               | 52.2±12.13  | 15.7±15.3      | -1.4±5.79                                    |
| Nazanin, R. 2015        | Iran                     | secondary RLS | Gabapentin            | 42          | 42.9             | 57.8±13.7   | NA             | -17.4±5.24                                   |
|                         |                          |               | Levodopa              | 40          | 45               | 52.6±11.5   | NA             | -13.4±6.61                                   |
| Susan, A. 2012          | USA                      | primary RLS   | Gabapentin Enacarbil  | 508         | 60               | 48.1±12.71  | 13.5±12.82     | -13.6±9.00                                   |
|                         |                          |               | Placebo               | 244         | 62               | 49.3±12.32  | 13.9±12.99     | -9.3±8.59                                    |
| James, W. 2009          | USA                      | primary RLS   | Iron                  | 11          | 54.5             | mean age 60 | NA             | -10.3±7.40                                   |
|                         |                          |               | Placebo               | 7           | 71.4             | mean age 58 | NA             | -1.1±5.60                                    |
| Richard, K. B. 2006     | USA                      | primary RLS   | Ropinirole            | 187         | 58.3             | 52.2±12.79  | NA             | -13.6±6.47                                   |
|                         |                          |               | Placebo               | 193         | 63.7             | 52.4±13.15  | NA             | -9.7±7.97                                    |
| Ma, J.F. 2012           | China                    | primary RLS   | Pramipexole           | 203         | 60.4             | 56.46±11.88 | NA             | -15.8±10.31                                  |
|                         |                          |               | Placebo               | 103         | 72.8             | 56.86±11.89 | NA             | -11.4±9.33                                   |
| Arthur, S. W.2004       | USA                      | primary RLS   | Ropinirole            | 131         | 58               | 54.9±10.87  | NA             | -11.2±8.69                                   |
|                         |                          |               | Placebo               | 135         | 61.5             | 56.0±11.25  | NA             | -8.7±8.71                                    |

|                         |                             |               |                      |     |      |            |            |             |
|-------------------------|-----------------------------|---------------|----------------------|-----|------|------------|------------|-------------|
| Luigi, F.S. 2008        | USA                         | NA            | Pramipexole          | 182 | 72.5 | 56.3±12.4  | 5.36±9.8   | -13.4±9.44  |
|                         |                             |               | Placebo              | 187 | 63.6 | 56.9±13.0  | 5.66±9.9   | -9.6±9.57   |
| Yuichi, I. 2010         | Japan                       | primary RLS   | Pramipexole          | 20  | 55   | 48.7±16.1  | 0.2±0.6    | -16.1±7.39  |
|                         |                             |               | Placebo              | 21  | 47.6 | 62.3±11.9  | 0.6 ± 1.3  | -6.4±7.98   |
| Claudia, T. 2008        | Austria, Finland,<br>et al. | primary RLS   | Rotigotine           | 333 | 73   | 57.3±12.1  | NA         | -16.8±9.52  |
|                         |                             |               | Placebo              | 114 | 70   | 59.7±10.0  | NA         | -8.6±9.60   |
| Ludger, G. 2009         | Sweden                      | primary RLS   | Iron                 | 29  | 86.2 | 47.0 ±10.0 | NA         | -8.7±9.40   |
|                         |                             |               | Placebo              | 31  | 90.3 | 46.0±8.0   | NA         | -6.9±9.70   |
| Wayne, A. H. 2010       | USA                         | primary RLS   | Rotigotine           | 395 | 63   | 53.2±12.2  | 2.5±4.7    | -14.3±9.4   |
|                         |                             |               | Placebo              | 99  | 57   | 52.8±12.6  | 2.1±4.4    | -9.0±7.70   |
| Claudia, T. 2013        | Austria, Germany,<br>et al. | NA            | Oxycodone-naloxone   | 132 | 65   | NA         | 10.2±9.8   | -19.3±8.23  |
|                         |                             |               | Placebo              | 144 | 68   | NA         | 10.4±10.2  | -13.6±10.75 |
| Kolster, K. S.2004      | Germany                     | NA            | Cabergoline          | 62  | 50   | 56.4±9.1   | 18.1±12.6  | -15.7±11.9  |
|                         |                             |               | Placebo              | 22  | 81.8 | 55.6±9.2   | 19.8±14.2  | -3.3±8.00   |
| Markku, P. 2006         | Finland                     | primary RLS   | Pramipexole          | 83  | 81.8 | 60.0±10.1  | 5.1±11.1   | -17.0±6.94  |
|                         |                             |               | Placebo              | 21  | 81   | 53.3±11.1  | 2.7±10.1   | -6.1±6.92   |
| Deng, Y.H. 2017         | China                       | secondary RLS | Iron                 | 16  | NA   | 63.63±4.83 | NA         | -7.4±2.03   |
|                         |                             |               | Placebo              | 16  | NA   | 64.19±7.93 | NA         | -0.8±2.61   |
| Pasquale, M.2011        | Finland, France,<br>et al.  | primary RLS   | Pramipexole          | 203 | 67   | 55.0±13.8  | 3.5±7.2    | -14.2±9.97  |
|                         |                             |               | Placebo              | 200 | 73   | 56.1±12.1  | 3.3 ±6.5   | -8.1±9.89   |
| John, W. W.2011         | USA                         | primary RLS   | Gabapentin Enacarbil | 131 | NA   | 52.0±12.7  | NA         | -15.0±8.30  |
|                         |                             |               | Placebo              | 131 | NA   | 52.0±12.7  | NA         | -8.4±8.16   |
| Oertel, W.H. 2006       | USA                         | primary RLS   | Cabergoline          | 20  | 70   | 57.3±10.3  | 13.6 ±10.3 | -23.7±11.20 |
|                         |                             |               | Placebo              | 20  | 75   | 55.5±9.3   | 22.1 ±16.0 | -7.9±11.00  |
| Claudia, T. 2017        | Germany                     | NA            | Iron                 | 59  | 81.4 | 53.0±15.7  | NA         | -9.6±10.7   |
|                         |                             |               | Placebo              | 51  | 82.4 | 55.5±15.9  | NA         | -5.0±10.71  |
| Birgit, H. 2011         | European<br>countries       | primary RLS   | Pramipexole          | 166 | 61.4 | 57.9±12.7  | 6.0±9.6    | -13.7±10.31 |
|                         |                             |               | Placebo              | 163 | 57.7 | 55.8±11.4  | 5.4±8.5    | -11.1±10.21 |
| Wolfgang, H. O.<br>2010 | Austria, Finland,<br>et al. | primary RLS   | Rotigotine           | 46  | 76   | 60.8±9.4   | 1.8±2.9    | -16.5±9.30  |
|                         |                             |               | Placebo              | 20  | 70   | 56.3±9.8   | 3.1±8.0    | -9.9±9.90   |

|                      |             |             |                      |     |      |            |            |             |
|----------------------|-------------|-------------|----------------------|-----|------|------------|------------|-------------|
| Richard, A. 2010     | USA         | primary RLS | Pregabalin           | 114 | 59.1 | 50.5±11.9  | mean 7.5   | -16.0±8.91  |
|                      |             |             | Placebo              | 23  | 56.5 | 50.3±10.5  | mean 8.7   | -7.7±8.15   |
| Wolfgang, H. O. 2010 | NA          | primary RLS | Rotigotine           | 280 | 68.6 | 58.9±9.9   | NA         | -17.3±10.5  |
|                      |             |             | Placebo              | 53  | 60.4 | 58.5±11.4  | NA         | -9.3±9.60   |
| Zhang, J.Y. 2015     | China       | primary RLS | Pramipexole          | 102 | 65.7 | 53.6±12.9  | 1.62±0.7   | -13.2±7.07  |
|                      |             |             | Placebo              | 102 | 61.8 | 52.9±13.1  | 1.59±0.6   | -9.4±6.06   |
|                      |             |             | Pregabalin           | 182 | 67.6 | 54.3±13.0  | NA         | -11.4±6.65  |
| Richard, P. A. 2014  | USA         | primary RLS | Pramipexole          | 358 | 55   | 54.2±13.5  | NA         | -10.1±6.65  |
|                      |             |             | Placebo              | 179 | 62   | 53.5±13.3  | NA         | -6.9±6.48   |
| Winkelman, J.W. 2006 | USA         | primary RLS | Pramipexole          | 254 | 66.7 | 53.4±12.7  | 4.9 ±15.0  | -14.0±9.33  |
|                      |             |             | Placebo              | 85  | 63.5 | 51.5±14.0  | 5.2±15.0   | -9.3±9.22   |
| Richard, P. A. 2011  | USA         | NA          | Iron                 | 24  | 70.1 | 49.5±11.4  | NA         | -8.9±8.50   |
|                      |             |             | Placebo              | 19  | 52.6 | 54.8±13.6  | NA         | -4.0±6.10   |
| Diego, G.B. 2010     | Spain       | primary RLS | Pregabalin           | 30  | NA   | 48.23±13.2 | 13.63±10.3 | -13.0±5.99  |
|                      |             |             | Placebo              | 28  | NA   | 53.0±14.7  | 16.79±13.2 | -10.3±7.46  |
| Lee, C. S. 2014      | Korea       | NA          | Iron                 | 15  | 93.3 | 53.3±13.0  | NA         | -9.1±7.07   |
|                      |             |             | Pramipexole          | 15  | 100  | 59.1±10.83 | NA         | -8.7±8.31   |
| Aaron, L. 2011       | USA         | primary RLS | Gabapentin Enacarbil | 197 | 60.4 | 49.5±12.0  | NA         | -15.4±8.96  |
|                      |             |             | Placebo              | 376 | 57.7 | 50.6±11.8  | NA         | -14.8±8.64  |
| Yuichi, I. 2013      | Japan       | primary RLS | Rotigotine           | 189 | 48.9 | 50.7±13.3  | 13.4±13.1  | -14.6±9.00  |
|                      |             |             | Placebo              | 95  | 56.8 | 53.4±15.3  | 15.7±14.4  | -14.3±8.9   |
| Arthur, S.W. 2009    | NA          | primary RLS | Gabapentin Enacarbil | 62  | 67   | 51.9±11.2  | NA         | -16.1±7.93  |
|                      |             |             | Placebo              | 33  | 52   | 49.4±10.9  | NA         | -8.9±7.72   |
| Claudio, L. 2011     | Switzerland | primary RLS | Pramipexole          | 31  | NA   | 57.0±11.0  | NA         | -7.2±9.50   |
|                      |             |             | Levodopa             | 28  | NA   | 57.0±11.0  | NA         | -4.0±7.50   |
| Neal, H. 2016        | USA         | NA          | Gabapentin enacarbil | 233 | 58   | 48.1±12.7  | 13.5 ±12.8 | -14.9±9.59  |
|                      |             |             | Placebo              | 133 | 62   | 49.3±12.3  | 13.9 ±12.9 | -9.5±8.62   |
| Diego, G.B. 2015     | USA         | primary RLS | Rotigotine           | 101 | 57.4 | 47.9±14.2  | mean 2.3   | -14.9±9.30  |
|                      |             |             | Placebo              | 49  | 40.8 | 47.9±13.7  | mean 2.0   | -12.7±7.60  |
| Claudia, T. 2006     | Germany     | primary RLS | Ropinirole           | 45  | 47.6 | 54.0±11.13 | NA         | -15.5±6.74  |
|                      |             |             | Placebo              | 47  | 63.8 | 56.2±11.2  | NA         | -14.8±6.63  |
| Diego, G.B. 2012     | NA          | primary RLS | Ropinirole           | 196 | 63   | 56.5±11.9  | NA         | -15.9±10.64 |
|                      |             |             | Placebo              | 205 | 63   | 56.1±11.4  | NA         | -13.4±11.02 |

|                   |                            |             |                      |     |      |            |            |             |
|-------------------|----------------------------|-------------|----------------------|-----|------|------------|------------|-------------|
| Cho, Y.W. 2017    | Korea                      | primary RLS | Iron                 | 32  | 81.3 | 47.3±13.3  | 12.9±14.3  | -8.3±7.50   |
|                   |                            |             | Placebo              | 32  | 81.3 | 51.5±12.0  | 9.0±8.8    | -4.8±8.70   |
| Daniel, O.L. 2011 | USA                        | primary RLS | Gabapentin Enacarbil | 207 | 59   | 48.3±12.8  | 13.5 ±13.1 | -13.0±7.08  |
|                   |                            |             | Placebo              | 96  | 59   | 49.1±12.2  | 14.4 ±12.9 | -9.8±6.85   |
| Claudia, T. 2004  | European countries         | NA          | Ropinirole           | 146 | 60.3 | 54.0±11.1  | 16.4±14.1  | -11.4±11.72 |
|                   |                            |             | Placebo              | 138 | 65.9 | 56.2±11.2  | 17.3±14.9  | -8.03±8.67  |
| Jacques, M. 2004  | Australia, Austria, et al. | primary RLS | Ropinirole           | 131 | 46.7 | 51.6±11.33 | 22.0±15.31 | -11.2±8.69  |
|                   |                            |             | Placebo              | 135 | 63.8 | 55.3±11.03 | 23.6±15.35 | -8.7±8.71   |

MD, mean difference; NA, not applicable; RLS, Restless leg syndrome; SD, standard deviation

**Supplementary Table 2. Network meta-analysis result of common side effects of pharmacological treatments for RLS**

|                                                   | Levodopa           | Placebo            | Gabapentin enacarbil | Pregabalin         | Oxycodone–naloxone  | Cabergoline         | Rotigotine         | Pramipexole        | Ropinirole          | Iron                |
|---------------------------------------------------|--------------------|--------------------|----------------------|--------------------|---------------------|---------------------|--------------------|--------------------|---------------------|---------------------|
| <b>(a)Nausea as a side effect [OR (95% CI)]</b>   |                    |                    |                      |                    |                     |                     |                    |                    |                     |                     |
| Levodopa                                          |                    | 1.79 (0.23,13.93)  | 1.81 (0.21,15.43)    | 3.52 (0.27,45.32)  | 3.75 (0.30,47.06)   | 3.86 (0.93,16.05)   | 4.48 (0.52,38.77)  | 5.71 (0.65,50.51)  | 8.98 (1.03,78.30)   | 16.11 (0.32,823.27) |
| Placebo                                           | 0.56 (0.07,4.35)   |                    | 1.01 (0.55,1.87)     | 1.96 (0.43,9.04)   | 2.10 (0.48,9.19)    | 2.16 (0.49,9.44)    | 2.50 (1.28,4.87)   | 3.19 (1.53,6.67)   | 5.02 (2.50,10.06)   | 9.00 (0.31,258.16)  |
| Gabapentin enacarbil                              | 0.55 (0.06,4.70)   | 0.99 (0.53,1.83)   |                      | 1.94 (0.37,10.05)  | 2.07 (0.42,10.26)   | 2.13 (0.43,10.53)   | 2.47 (1.00,6.12)   | 3.15 (1.21,8.22)   | 4.95 (1.96,12.53)   | 8.89 (0.29,269.57)  |
| Pregabalin                                        | 0.28 (0.02,3.66)   | 0.51 (0.11,2.34)   | 0.52 (0.10,2.67)     |                    | 1.07 (0.13,8.93)    | 1.10 (0.13,9.16)    | 1.27 (0.24,6.74)   | 1.62 (0.40,6.59)   | 2.55 (0.48,13.65)   | 4.58 (0.11,182.89)  |
| Oxycodone–naloxone                                | 0.27 (0.02,3.34)   | 0.48 (0.11,2.09)   | 0.48 (0.10,2.39)     | 0.94 (0.11,7.85)   |                     | 1.03 (0.13,8.31)    | 1.19 (0.24,6.04)   | 1.52 (0.29,7.94)   | 2.39 (0.47,12.26)   | 4.29 (0.11,168.04)  |
| Cabergoline                                       | 0.26 (0.06,1.08)   | 0.46 (0.11,2.03)   | 0.47 (0.09,2.32)     | 0.91 (0.11,7.61)   | 0.97 (0.12,7.85)    |                     | 1.16 (0.23,5.87)   | 1.48 (0.28,7.70)   | 2.33 (0.46,11.88)   | 4.17 (0.11,163.29)  |
| Rotigotine                                        | 0.22 (0.03,1.94)   | 0.40 (0.21,0.78)   | 0.40 (0.16,1.00)     | 0.79 (0.15,4.16)   | 0.84 (0.17,4.24)    | 0.86 (0.17,4.37)    |                    | 1.28 (0.47,3.45)   | 2.01 (0.76,5.27)    | 3.60 (0.12,110.25)  |
| Pramipexole                                       | 0.17 (0.02,1.55)   | 0.31 (0.15,0.65)   | 0.32 (0.12,0.83)     | 0.62 (0.15,2.50)   | 0.66 (0.13,3.42)    | 0.68 (0.13,3.51)    | 0.78 (0.29,2.12)   |                    | 1.57 (0.57,4.32)    | 2.82 (0.09,87.57)   |
| Ropinirole                                        | 0.11 (0.01,0.97)   | 0.20 (0.10,0.40)   | 0.20 (0.08,0.51)     | 0.39 (0.07,2.09)   | 0.42 (0.08,2.14)    | 0.43 (0.08,2.20)    | 0.50 (0.19,1.31)   | 0.64 (0.23,1.75)   |                     | 1.79 (0.06,55.27)   |
| Iron                                              | 0.06 (0.00,3.17)   | 0.11 (0.00,3.19)   | 0.11 (0.00,3.41)     | 0.22 (0.01,8.72)   | 0.23 (0.01,9.12)    | 0.24 (0.01,9.37)    | 0.28 (0.01,8.51)   | 0.35 (0.01,11.02)  | 0.56 (0.02,17.17)   |                     |
| <b>(b)Fatigue as a side effect [OR (95% CI)]</b>  |                    |                    |                      |                    |                     |                     |                    |                    |                     |                     |
| Levodopa                                          |                    | 1.56 (0.25,9.74)   | 1.57 (0.24,10.16)    | 2.65 (0.36,19.25)  | 4.32 (0.63,29.82)   | 3.08 (1.32,7.21)    | 1.74 (0.26,11.65)  | 2.09 (0.32,13.67)  | 4.26 (0.63,29.03)   | 0.29 (0.01,13.29)   |
| Placebo                                           | 0.64 (0.10,4.03)   |                    | 1.01 (0.71,1.43)     | 1.70 (0.80,3.62)   | 2.78 (1.52,5.08)    | 1.98 (0.39,10.09)   | 1.12 (0.68,1.83)   | 1.34 (0.89,2.02)   | 2.74 (1.56,4.81)    | 0.19 (0.01,5.34)    |
| Gabapentin enacarbil                              | 0.64 (0.10,4.12)   | 0.99 (0.70,1.40)   |                      | 1.69 (0.74,3.87)   | 2.75 (1.37,5.51)    | 1.96 (0.37,10.35)   | 1.11 (0.61,2.02)   | 1.33 (0.78,2.27)   | 2.71 (1.40,5.26)    | 0.19 (0.01,5.38)    |
| Pregabalin                                        | 0.38 (0.05,2.74)   | 0.59 (0.28,1.25)   | 0.59 (0.26,1.36)     |                    | 2.07 (1.00,4.29)    | 1.16 (0.19,6.99)    | 0.66 (0.27,1.62)   | 0.79 (0.41,1.50)   | 1.61 (0.63,4.10)    | 0.11 (0.00,3.41)    |
| Oxycodone–naloxone                                | 0.23 (0.03,1.59)   | 0.36 (0.20,0.66)   | 0.36 (0.18,0.73)     | 0.61 (0.23,1.61)   |                     | 0.71 (0.13,4.04)    | 0.40 (0.19,0.88)   | 0.48 (0.23,1.00)   | 0.99 (0.43,2.25)    | 0.07 (0.00,2.03)    |
| Cabergoline                                       | 0.32 (0.14,0.76)   | 0.50 (0.10,2.56)   | 0.51 (0.10,2.69)     | 0.86 (0.14,5.16)   | 1.40 (0.25,7.94)    |                     | 0.40 (0.19,0.88)   | 0.68 (0.13,3.62)   | 1.38 (0.25,7.72)    | 0.09 (0.00,3.92)    |
| Rotigotine                                        | 0.17 (0.01,4.94)   | 0.89 (0.55,1.46)   | 0.90 (0.49,1.65)     | 1.52 (0.62,3.74)   | 2.48 (1.14,5.40)    | 1.77 (0.32,9.68)    |                    | 1.20 (0.63,2.27)   | 2.45 (1.16,5.17)    | 0.17 (0.01,4.94)    |
| Pramipexole                                       | 0.14 (0.00,4.08)   | 0.75 (0.50,1.12)   | 0.75 (0.44,1.29)     | 1.27 (0.67,2.42)   | 2.07 (1.00,4.29)    | 1.48 (0.28,7.91)    | 0.84 (0.44,1.58)   |                    | 2.04 (1.02,4.09)    | 0.14 (0.00,4.08)    |
| Ropinirole                                        | 0.23 (0.03,1.60)   | 0.36 (0.21,0.64)   | 0.37 (0.19,0.71)     | 0.62 (0.24,1.59)   | 1.01 (0.45,2.31)    | 0.72 (0.13,4.04)    | 0.41 (0.19,0.86)   | 0.49 (0.24,0.98)   |                     | 0.07 (0.00,2.04)    |
| Iron                                              | 3.41 (0.08,154.84) | 5.31 (0.19,150.49) | 5.36 (0.19,154.83)   | 9.05 (0.29,278.85) | 14.76 (0.49,441.64) | 10.53 (0.26,434.16) | 5.95 (0.20,174.88) | 7.12 (0.25,207.07) | 14.55 (0.49,432.35) |                     |
| <b>(c)Headache as a side effect [OR (95% CI)]</b> |                    |                    |                      |                    |                     |                     |                    |                    |                     |                     |
| Levodopa                                          |                    | 3.21 (0.22,47.88)  | 3.61 (0.22,58.04)    | 2.18 (0.11,42.73)  | 6.43 (0.26,161.32)  | 1.52 (0.28,8.42)    | 2.59 (0.16,43.23)  | 3.61 (0.22,59.55)  | 3.62 (0.22,60.32)   | 2.77 (0.07,117.14)  |
| Placebo                                           | 0.31 (0.02,4.64)   |                    | 1.12 (0.59,2.15)     | 0.68 (0.19,2.36)   | 2.00 (0.34,11.60)   | 0.47 (0.06,3.83)    | 0.81 (0.37,1.77)   | 1.12 (0.53,2.37)   | 1.13 (0.51,2.47)    | 0.86 (0.06,11.52)   |
| Gabapentin enacarbil                              | 0.28 (0.02,4.47)   | 0.89 (0.47,1.71)   |                      | 0.60 (0.15,2.46)   | 1.78 (0.27,11.61)   | 0.42 (0.05,3.77)    | 0.72 (0.26,1.99)   | 1.00 (0.37,2.69)   | 1.00 (0.36,2.78)    | 0.77 (0.05,11.12)   |
| Pregabalin                                        | 0.46 (0.02,9.00)   | 1.47 (0.42,5.14)   | 1.65 (0.41,6.73)     |                    | 2.95 (0.34,25.46)   | 0.70 (0.06,7.98)    | 1.19 (0.27,5.16)   | 1.66 (0.48,5.78)   | 1.66 (0.38,7.23)    | 1.27 (0.07,22.58)   |
| Oxycodone–naloxone                                | 0.16 (0.01,3.91)   | 0.50 (0.09,2.90)   | 0.56 (0.09,3.66)     | 0.34 (0.04,2.93)   |                     | 0.24 (0.02,3.64)    | 0.40 (0.06,2.77)   | 0.56 (0.08,3.79)   | 0.56 (0.08,3.86)    | 0.43 (0.02,9.88)    |
| Cabergoline                                       | 0.66 (0.12,3.64)   | 2.11 (0.26,17.09)  | 2.37 (0.27,21.17)    | 1.43 (0.13,16.35)  | 4.22 (0.27,64.86)   |                     | 1.70 (0.18,15.91)  | 2.37 (0.26,21.86)  | 2.38 (0.26,22.20)   | 1.82 (0.07,50.89)   |
| Rotigotine                                        | 0.39 (0.02,6.43)   | 1.24 (0.56,2.72)   | 1.39 (0.50,3.85)     | 0.84 (0.19,3.64)   | 2.48 (0.36,17.00)   | 0.59 (0.06,5.48)    |                    | 1.39 (0.47,4.11)   | 1.40 (0.46,4.23)    | 1.07 (0.07,16.04)   |
| Pramipexole                                       | 0.28 (0.02,4.56)   | 0.89 (0.42,1.87)   | 1.00 (0.37,2.68)     | 0.60 (0.17,2.10)   | 1.78 (0.26,12.00)   | 0.42 (0.05,3.88)    | 0.72 (0.24,2.12)   |                    | 1.00 (0.34,2.95)    | 0.77 (0.05,11.37)   |
| Ropinirole                                        | 0.28 (0.02,4.60)   | 0.89 (0.41,1.94)   | 1.00 (0.36,2.75)     | 0.60 (0.14,2.62)   | 1.77 (0.26,12.16)   | 0.42 (0.05,3.92)    | 0.72 (0.24,2.17)   | 1.00 (0.34,2.94)   |                     | 0.77 (0.05,11.47)   |
| Iron                                              | 0.36 (0.01,15.22)  | 1.16 (0.09,15.44)  | 1.30 (0.09,18.78)    | 0.79 (0.04,13.93)  | 2.32 (0.10,52.99)   | 0.55 (0.02,15.31)   | 0.93 (0.06,14.01)  | 1.30 (0.09,19.28)  | 1.31 (0.09,19.54)   |                     |

(d) Dizziness as a side effect [OR (95% CI)]

|                      |                  |                   |                     |                     |                     |                   |                   |                   |                     |                    |
|----------------------|------------------|-------------------|---------------------|---------------------|---------------------|-------------------|-------------------|-------------------|---------------------|--------------------|
| Levodopa             |                  | 5.44 (0.51,58.28) | 20.11 (1.75,230.97) | 15.44 (0.96,248.78) | 19.34 (1.04,359.53) | 2.89 (0.68,12.30) | 6.49 (0.53,80.26) | 4.81 (0.36,64.05) | 13.77 (1.10,172.80) | 7.25 (0.17,308.11) |
| Placebo              | 0.18 (0.02,1.97) |                   | 3.70 (2.08,6.58)    | 2.84 (0.67,12.09)   | 3.56 (0.65,19.61)   | 0.53 (0.08,3.48)  | 1.19 (0.52,2.75)  | 0.88 (0.31,2.50)  | 2.53 (1.05,6.10)    | 1.33 (0.07,24.33)  |
| Gabapentin enacarbil | 0.05 (0.00,0.57) | 0.27 (0.15,0.48)  |                     | 0.77 (0.16,3.65)    | 0.96 (0.16,5.83)    | 0.14 (0.02,1.02)  | 0.32 (0.12,0.89)  | 0.24 (0.07,0.78)  | 0.68 (0.24,1.96)    | 0.36 (0.02,6.96)   |
| Pregabalin           | 0.06 (0.00,1.04) | 0.35 (0.08,1.50)  | 1.30 (0.27,6.18)    |                     | 1.25 (0.13,11.75)   | 0.19 (0.02,2.00)  | 0.42 (0.08,2.23)  | 0.31 (0.09,1.09)  | 0.89 (0.16,4.85)    | 0.47 (0.02,12.05)  |
| Oxycodone–naloxone   | 0.05 (0.00,0.96) | 0.28 (0.05,1.55)  | 1.04 (0.17,6.30)    | 0.80 (0.09,7.49)    |                     | 0.15 (0.01,1.89)  | 0.34 (0.05,2.24)  | 0.25 (0.03,1.83)  | 0.71 (0.10,4.85)    | 0.37 (0.01,10.88)  |
| Cabergoline          | 0.35 (0.08,1.47) | 1.88 (0.29,12.31) | 6.96 (0.98,49.64)   | 5.35 (0.50,57.29)   | 6.70 (0.53,84.72)   |                   | 2.25 (0.29,17.55) | 1.67 (0.19,14.23) | 4.77 (0.60,37.91)   | 2.51 (0.08,79.71)  |
| Rotigotine           | 0.15 (0.01,1.90) | 0.84 (0.36,1.93)  | 3.10 (1.13,8.51)    | 2.38 (0.45,12.63)   | 2.98 (0.45,19.91)   | 0.44 (0.06,3.47)  |                   | 0.74 (0.20,2.80)  | 2.12 (0.63,7.12)    | 1.12 (0.05,22.90)  |
| Pramipexole          | 0.21 (0.02,2.77) | 1.13 (0.40,3.19)  | 4.18 (1.28,13.68)   | 3.21 (0.92,11.23)   | 4.02 (0.55,29.62)   | 0.60 (0.07,5.13)  | 1.35 (0.36,5.10)  |                   | 2.86 (0.73,11.14)   | 1.51 (0.07,32.89)  |
| Ropinirole           | 0.07 (0.01,0.91) | 0.39 (0.16,0.95)  | 1.46 (0.51,4.18)    | 1.12 (0.21,6.11)    | 1.41 (0.21,9.58)    | 0.21 (0.03,1.67)  | 0.47 (0.14,1.58)  | 0.35 (0.09,1.36)  |                     | 0.53 (0.03,10.94)  |
| Iron                 | 0.14 (0.00,5.86) | 0.75 (0.04,13.68) | 2.77 (0.14,53.57)   | 2.13 (0.08,54.68)   | 2.67 (0.09,77.48)   | 0.40 (0.01,12.66) | 0.90 (0.04,18.38) | 0.66 (0.03,14.49) | 1.90 (0.09,39.47)   |                    |

(e) Somnolence as a side effect [OR (95% CI)]

|                      |  |                   |                   |                   |                   |                   |                   |                   |                   |
|----------------------|--|-------------------|-------------------|-------------------|-------------------|-------------------|-------------------|-------------------|-------------------|
| Placebo              |  |                   | 3.56 (1.77,7.14)  | 4.67 (1.23,17.66) | 2.51 (0.38,16.73) | 2.60 (0.08,80.47) | 1.49 (0.59,3.77)  | 1.69 (0.51,5.61)  | 2.31 (0.63,8.39)  |
| Gabapentin enacarbil |  | 0.28 (0.14,0.56)  |                   | 1.31 (0.29,5.89)  | 0.70 (0.09,5.32)  | 0.73 (0.02,24.26) | 0.42 (0.13,1.33)  | 0.48 (0.12,1.90)  | 0.65 (0.15,2.81)  |
| Pregabalin           |  | 0.21 (0.06,0.81)  | 0.76 (0.17,3.43)  |                   | 0.54 (0.05,5.46)  | 0.56 (0.01,22.13) | 0.32 (0.06,1.62)  | 0.36 (0.09,1.44)  | 0.49 (0.08,3.16)  |
| Oxycodone–naloxone   |  | 0.40 (0.06,2.66)  | 1.42 (0.19,10.71) | 1.86 (0.18,18.90) |                   | 1.04 (0.02,52.38) | 0.59 (0.07,4.91)  | 0.68 (0.07,6.37)  | 0.92 (0.09,9.13)  |
| Cabergoline          |  | 0.38 (0.01,11.87) | 1.37 (0.04,45.31) | 1.79 (0.05,71.08) | 0.96 (0.02,48.59) |                   | 0.57 (0.02,19.99) | 0.65 (0.02,24.65) | 0.89 (0.02,34.64) |
| Rotigotine           |  | 0.67 (0.27,1.70)  | 2.39 (0.75,7.62)  | 3.13 (0.62,15.89) | 1.68 (0.20,13.93) | 1.75 (0.05,61.17) |                   | 1.14 (0.25,5.18)  | 1.55 (0.32,7.60)  |
| Pramipexole          |  | 0.59 (0.18,1.95)  | 2.10 (0.53,8.39)  | 2.75 (0.69,10.94) | 1.48 (0.16,13.96) | 1.54 (0.04,58.18) | 0.88 (0.19,4.00)  |                   | 1.36 (0.23,7.92)  |
| Ropinirole           |  | 0.43 (0.12,1.58)  | 1.54 (0.36,6.69)  | 2.02 (0.32,12.92) | 1.09 (0.11,10.79) | 1.13 (0.03,44.12) | 0.65 (0.13,3.16)  | 0.73 (0.13,4.27)  |                   |

(f) Nasopharyngitis as a side effect [OR (95% CI)]

|                      |  |                  |                  |                  |  |  |                  |                  |                  |
|----------------------|--|------------------|------------------|------------------|--|--|------------------|------------------|------------------|
| Placebo              |  |                  | 0.93 (0.57,1.53) | 0.95 (0.24,3.76) |  |  | 1.45 (0.49,4.32) | 1.03 (0.52,2.05) | 1.23 (0.53,2.86) |
| Gabapentin enacarbil |  | 1.08 (0.65,1.77) |                  | 1.02 (0.24,4.42) |  |  | 1.56 (0.47,5.18) | 1.11 (0.47,2.59) | 1.32 (0.49,3.52) |
| Pregabalin           |  | 1.05 (0.27,4.19) | 0.98 (0.23,4.25) |                  |  |  | 1.53 (0.27,8.86) | 1.09 (0.33,3.59) | 1.29 (0.26,6.53) |
| Rotigotine           |  | 0.69 (0.23,2.04) | 0.64 (0.19,2.12) | 0.65 (0.11,3.76) |  |  |                  | 0.71 (0.20,2.55) | 0.84 (0.21,3.34) |
| Pramipexole          |  | 0.97 (0.49,1.93) | 0.90 (0.39,2.11) | 0.92 (0.28,3.04) |  |  | 1.41 (0.39,5.10) |                  | 1.19 (0.40,3.55) |
| Iron                 |  | 0.81 (0.35,1.90) | 0.76 (0.28,2.02) | 0.77 (0.15,3.89) |  |  | 1.18 (0.30,4.70) | 0.84 (0.28,2.49) |                  |

CI, confidence interval; OR, odds ratio; RLS, restless legs syndrome



**Supplementary Table 3.** Surface Under the Cumulative Ranking Curve (SUCRA) of all included drugs.

| Treatment            | Efficacy SUCRA | PrBest | MeanRank |
|----------------------|----------------|--------|----------|
| Placebo              | 0.4            | 0.0    | 11.0     |
| Gabapentin           | 80.1           | 10.1   | 3.0      |
| Gabapentin enacarbil | 32.6           | 0.0    | 7.7      |
| Ropinirole           | 16.8           | 0.0    | 9.3      |
| Rotigotine           | 54.7           | 0.1    | 5.5      |
| Pramipexole          | 57.2           | 0.0    | 5.3      |
| Iron                 | 51.0           | 0.0    | 5.9      |
| Levodopa             | 41.5           | 0.0    | 6.9      |
| Pregabalin           | 56.4           | 0.2    | 5.4      |
| Cabergoline          | 98.7           | 87.7   | 1.1      |
| Oxycodone-naloxone   | 60.7           | 1.8    | 4.9      |

**Supplementary Table 4.** Surface Under the Cumulative Ranking Curve (SUCRA) of the rest of drugs after excluding cabergoline.

| Treatment            | Efficacy SUCRA | PrBest | MeanRank |
|----------------------|----------------|--------|----------|
| Placebo              | 3.7            | 0.0    | 9.7      |
| Gabapentin           | 69.5           | 40.2   | 3.7      |
| Gabapentin enacarbil | 42.6           | 0.2    | 6.2      |
| Ropinirole           | 24.4           | 0.0    | 7.8      |
| Rotigotine           | 66.6           | 8.3    | 4.0      |
| Pramipexole          | 66.9           | 3.4    | 4.0      |
| Iron                 | 62.7           | 6.0    | 4.4      |
| Levodopa             | 23.4           | 0.2    | 7.9      |
| Pregabalin           | 68.7           | 12.8   | 3.8      |
| Oxycodone-naloxone   | 71.6           | 28.8   | 3.6      |
